# Supplementary material
Source: HighWire-hosted journal article supplement (https://heart.bmj.com/content/105/17/1343)
Supplement: inline-supplementary-material-1 [file inline-supplementary-material-1.docx]

**Supplementary Information**

**Methods**

*Data Sources*

National hospitalisation data for England were from the Hospital Episodes Statistics (HES) dataset supplied by the English Health and Social Care Information Centre including all NHS hospitalisations in England. Mortality data for England were from the Office for National Statistics. For Australia, all public and private hospitalisation and mortality data were from the Australian Institute of Health and Welfare. The Oxford Record Linkage Study (ORLS) data were provided by the Unit of Health-Care Epidemiology, University of Oxford, and includes data from hospitals in the former Oxford Regional Health Authority area. The Western Australian (WA) data were from the Hospital Morbidity Data Collection, a core dataset from the WA Data Linkage System, and include all hospitalisations within WA.

*International Classification of Diseases versions*

In the English datasets, ICD Revision 9 (ICD-9) was used for hospital diagnoses until 31 March 1995, after which ICD-10 (WHO version) was introduced, while for mortality records, the transition to ICD-10 occurred on 1st January 2001. In Australia, ICD-9 was in use until 31st December 1987; ICD-9-Clinical Modification (CM) up to 30th June 1998 (30th June 1999 in WA), and ICD-10-Australian Modification (AM) from that time on.

*Standardisation of datasets*

The English dataset was based on Finished Consultant Episodes (FCEs). A new FCE within this dataset represents a shift to a different medical specialist within the same admission, an inter-hospital transfer, or a new hospital admission, and each FCE has a principal diagnosis and secondary diagnoses recorded. As the dataset is unlinked, it is not possible to determine which FCEs belong to any particular episode of care, but the data includes an indicator for first FCE in a series of related admissions. Therefore for the purposes of the current study, the FCE coded as the first in an admission sequence was used, as a proxy for admissions. The Australian hospitalisation dataset is separation-based, that is, one record represents an aggregation of data where a change between medical specialties within the same hospital occurred. Inter-hospital transfers and statistical type changes are represented by separate records in the dataset. The principal diagnosis is assigned to each admission at discharge, and represents that deemed the main condition requiring treatment and management during the hospitalisation. For the regional data, both datasets included data related to a single admission aggregated on one record. Inter-hospital transfers were identified for an individual patient where the admission date of a record was within one day of the discharge date of the previous record,

The Australian national hospitalisation data are available based on financial year of hospital admission, but are presented as calendar year to match the English, ORLS and WA datasets (for example, financial year 1996/97 in the Australian dataset is labelled as 1996 in the current study). The ICD-9-CM code 412 is not available in the national Australian data at the 3-digit level, due to the small number of admissions recorded with this code in the principal diagnosis. This only impacts 1996 – 1998 in the Australian data.

*Coronary procedure codes*

In England, procedures undertaken in hospital are coded using the OPCS Classifications of Procedures and Interventions (versions 4.2 to 4.6 during the study period). The following codes were used to identify coronary procedures: coronary angiography (K63), percutaneous coronary angioplasty (K49, K50, K75) and coronary artery bypass grafting (K40, K41, K42, K43, K44, K45, K46). In Australia, in-hospital procedures are coded using ICD-9-CM prior to 01 July 1998 (01 July 1999 in WA), and the ICD-10-AM Australian Classification of Health Interventions from that date on. The codes used to identify coronary angiography were 37.21, 37.22, 37.23, 38215-00, 38218-00, 38218-01, 38218-02; and,

percutaneous coronary angioplasty 36.02, 36.05, 36.06, 36.07, 35304-00, 35305-00, 38303-00, 38300-00, 35338-00, 35338-01, 35344-00, 35344-01, 38312-00, 38312-01, 38318-00, 38318-01, 35310-00, 35310-01, 35310-02, 38306-00, 38306-01, 38306-02, 35335-00, 35341-00, 38309-00, 38315-00, 90218-00, 90218-01, 90218-02, 90218-03; and

coronary artery bypass grafting 36.10, 36.11, 36.12, 36.13, 36.14, 36.15, 36.16, 36.17, 36.18, 36.19, 38497-00, 38497-01, 38497-02, 38497-03, 38497-04, 38497-05, 38497-06, 38497-07, 38500-00, 38500-01, 38500-02, 38500-03, 38500-04, 38500-05, 38503-00, 38503-01, 38503-02, 38503-03, 38503-04, 38503-05, 90201-00, 90201-01, 90201-02, 90201-03.

Supplementary Table 1. Baseline characteristics of hospitalisations for coronary heart disease in Oxford Record Linkage Study and Western Australia, using linked admissions.

|  | Oxford Record Linkage Study | | | | |  | Western Australia | | | | |
| --- | --- | --- | --- | --- | --- | --- | --- | --- | --- | --- | --- |
|  | Myocardial infarction | Unstable angina | Stable angina | Other  CHD | Total  CHD |  | Myocardial infarction | Unstable angina | Stable angina | Other  CHD | Total  CHD |
| **Men** |  |  |  |  |  |  |  |  |  |  |  |
| **1996-2003** |  |  |  |  |  |  |  |  |  |  |  |
| Total admissions, n | 15 075 | 10 566 | 8638 | 24 126 | 58 405 |  | 13 342 | 16 668 | 19 439 | 10 061 | 59 510 |
| Average annual admissions, n | 1884 | 1321 | 1080 | 3016 | 7301 |  | 1668 | 2084 | 2430 | 1258 | 7439 |
| Mean age, years (SD) | 64.2 (11.6) | 63.8 (11.4) | 63.7 (11.2) | 62.8 (9.9) | 63.5 (10.9) |  | 63.3 (12.1) | 64.4 (11.2) | 63.6 (10.7) | 63.2 (10.3) | 63.7 (11.1) |
| 1-year prior admission history, % |  |  |  |  |  |  |  |  |  |  |  |
| Acute coronary syndromes | 4.7 | 18.8 | 12.5 | 17.3 | **-** |  | 8.4 | 23.6 | 15.7 | 20.9 | **-** |
| Chronic CHD | 3.1 | 16.1 | 16.4 | 25.3 | **-** |  | 3.0 | 11.6 | 17.3 | 15.3 | **-** |
| **2004-2013** |  |  |  |  |  |  |  |  |  |  |  |
| Total admissions, n | 18 184 | 7500 | 7629 | 51 663 | 84 976 |  | 22 011 | 15 736 | 20 315 | 18 898 | 76 960 |
| Average annual admissions, n | 1818 | 750 | 763 | 5166 | 8498 |  | 2201 | 1574 | 2032 | 1890 | 7696 |
| Mean age, years (SD) | 64.4 (11.9) | 63.9 (11.8) | 64.8 (11.5) | 65.2 (10.2) | 64.8 (10.9) |  | 63.5 (12.1) | 64.1 (11.4) | 64.7 (10.8) | 65.3 (10.0) | 64.4 (11.2) |
| 1-year prior admission history, % |  |  |  |  |  |  |  |  |  |  |  |
| Acute coronary syndromes | 7.3 | 13.3 | 10.8 | 10.0 | - |  | 7.7 | 18.9 | 12.0 | 13.4 | **-** |
| Chronic CHD | 7.3 | 17.8 | 22.6 | 29.0 | - |  | 2.8 | 10.6 | 15.4 | 14.7 | **-** |
|  | Oxford Record Linkage Study | | | | |  | Western Australia | | | | |
|  | Myocardial infarction | Unstable angina | Stable angina | Other  CHD | Total  CHD |  | Myocardial infarction | Unstable angina | Stable angina | Other  CHD | Total  CHD |
| **Women** |  |  |  |  |  |  |  |  |  |  |  |
| **1996-2003** |  |  |  |  |  |  |  |  |  |  |  |
| Total admissions, n | 7039 | 5961 | 5356 | 8133 | 26 489 |  | 5660 | 9709 | 9107 | 3200 | 27 676 |
| Average annual admissions, n | 880 | 745 | 670 | 1017 | 3311 |  | 708 | 1214 | 1138 | 400 | 3460 |
| Mean age, years (SD) | 70.3 (10.3) | 67.2 (10.9) | 67.3 (11.2) | 65.8 (10.0) | 67.6 (10.7) |  | 69.9 (11.1) | 66.8 (11.8) | 66.8 (11.0) | 66.6 (10.1) | 68.1 (11.0) |
| 1-year prior admission history, % |  |  |  |  |  |  |  |  |  |  |  |
| Acute coronary syndrome | 5.3 | 16.3 | 11.3 | 15.0 | **-** |  | 9.4 | 22.2 | 14.7 | 18.6 | **-** |
| Chronic CHD | 3.1 | 12.9 | 14.2 | 21.2 | **-** |  | 3.0 | 9.1 | 12.5 | 10.8 | **-** |
| **2004-2013** |  |  |  |  |  |  |  |  |  |  |  |
| Total admissions, n | 7726 | 4291 | 5103 | 18 433 | 35 553 |  | 9378 | 8745 | 10 226 | 5995 | 34 344 |
| Average annual admissions, n | 773 | 429 | 510 | 1843 | 3555 |  | 938 | 875 | 1,023 | 600 | 3434 |
| Mean age, years (SD) | 70.0 (11.1) | 66.6 (11.7) | 67.2 (11.4) | 67.8 (10.0) | 68.1 (10.7) |  | 68.6 (12.0) | 68.7 (10.9) | 66.7 (11.4) | 67.6 (10.2) | 67.4 (11.5) |
| 1-year prior admission history, % |  |  |  |  |  |  |  |  |  |  |  |
| Acute coronary syndrome | 8.8 | 11.6 | 9.2 | 8.7 | - |  | 8.7 | 15.7 | 10.8 | 12.7 | **-** |
| Chronic CHD | 7.2 | 15.0 | 16.6 | 25.0 | - |  | 2.8 | 8.8 | 11.4 | 12.7 | **-** |

CHD, coronary heart disease; SD, standard deviation

Supplementary Table 2. Age-adjusted trends in coronary heart disease subgroups in the Oxford Record Linkage Study and Western Australia, for unlinked admissions, linked admissions, and 28-day episodes, stratified by period.

|  | Average annual % change (95% confidence interval)* | | | | | |
| --- | --- | --- | --- | --- | --- | --- |
|  | 1996-2003 | | | | | |
|  | Oxford Record Linkage Study | | | Western Australia | | |
|  | Unlinked | Linked admissions‡ | 28-day episodes | Unlinked | Linked admissions‡ | 28-day episodes |
| **Men** |  |  |  |  |  |  |
| Total CHD | +2.6 (+2.3, +3.0) | +2.4 (+2.0, +2.7) | +2.3 (+1.9, +2.7) | -3.4 (-3.7, -3.1) | -3.4 (-3.8, -3.1) | -3.1 (-3.4, -2.7) |
| Aggregated subgroups† |  |  |  |  |  |  |
| Acute coronary syndrome | -1.3 (-1.9, -0.8) | -1.7 (-2.2, -1.1) | -1.7 (-2.2, -1.1) | -3.1 (-3.6, -2.7) | -3.4 (-3.9, -3.0) | -3.4 (-3.9, -2.9) |
| Chronic CHD | +5.8 (+5.4, +6.3) | +5.7 (+5.2, +6.2) | +5.7 (+5.2, +6.2) | -3.7 (-4.2, -3.2) | -3.5 (-3.9, -3.0) | -2.7 (-3.3, -2.2) |
| Subgroups |  |  |  |  |  |  |
| Myocardial infarction | -2.2 (-2.8, -1.5) | -3.0 (-3.6, -2.3) | -3.1 (-3.8, -2.4) | -0.9 (-1.6, -0.2) | -1.5 (-2.2, -0.7) | -1.5 (-2.3, -0.8) |
| Unstable angina | -0.2 (-1.0, +0.6) | +0.3 (-0.6, +1.1) | +0.7 (-0.2, +1.5) | -5.0 (-5.6, -4.4) | -5.0 (-5.6, -4.3) | -4.9 (-5.6, -4.2) |
| Stable angina | -6.6(-7.5, -5.8) | -6.2 (-7.1, -5.3) | -6.2 (-7.1, -5.3) | -2.9 (-3.5, -2.4) | -2.8 (-3.4, -2.2) | -2.8 (-3.4, -2.1) |
| Other CHD | +10.5 (+9.9, +11.1) | +10.4 (+9.8, +11.0) | +10.4 (+9.8, +11.1) | -5.2 (-5.9, -4.4) | -4.7 (-5.5, -3.9) | -2.6 (-3.6, -1.7) |
| **Women** |  |  |  |  |  |  |
| Total CHD | +2.8 (+2.3, +3.3) | +2.6 (+2.0, +3.1) | +2.5 (+2.0, +3.1) | -3.5 (-4.0, -3.0) | -3.7 (-4.2, -3.2) | -3.5 (-4.0, -2.9) |
| Aggregated subgroups† |  |  |  |  |  |  |
| Acute coronary syndrome | -0.7 (-1.4, 0) | -0.7 (-1.5, 0) | -0.7 (-1.5, +0.1) | -3.4 (-4.1, -2.8) | -3.9 (-4.5, -3.2) | -3.9 (-4.6, -3.2) |
| Chronic CHD | +6.2 (+5.5, +7.0) | +5.9 (+5.1, +6.7) | +5.9 (+5.1, +6.8) | -3.5 (-4.3, -2.8) | -3.4 (-4.2, -2.7) | -2.9 (-3.7, -2.1) |
| Subgroups |  |  |  |  |  |  |
| Myocardial infarction | -3.4 (-4.3, -2.4) | -3.8 (-4.8, -2.8) | -3.8 (-4.8, -2.8) | -0.3 (-1.3, +0.8) | -1.0 (-2.1, +0.1) | -1.0 (-2.2, +0.1) |
| Unstable angina | +2.5 (+1.4, +3.6) | +3.0 (+1.9, +4.1) | +3.3 (+2.1, +4.5) | -5.3 (-6.0, -4.5) | -5.5 (-6.3, -4.7) | -5.7 (-6.5, -4.8) |
| Stable angina | -4.2 (-5.3, -3.1) | -3.9 (-5.1, -2.8) | -4.0 (-5.1, -2.8) | -3.1 (-3.9, -2.2) | -3.0 (-3.9, -2.1) | -2.9 (-3.8, -1.9) |
| Other CHD | +13.2 (+12.2, +14.3) | +13.2 (+12.1, +14.3) | +13.3 (+12.2, +14.5) | -4.8 (-6.2, -3.4) | -4.6 (-6.0, -3.1) | -2.9 (-4.6, -1.2) |

|  | 2004-2013 | | | | | |
| --- | --- | --- | --- | --- | --- | --- |
|  | Oxford Record Linkage Study | | | Western Australia | | |
|  | Unlinked | Linked admissions‡ | 28-day episodes | Unlinked | Linked admissions‡ | 28-day episodes |
| **Men** |  |  |  |  |  |  |
| Total CHD | -2.7 (-3, -2.5) | -1.9 (-2.1, -1.6) | -2.0 (-2.2, -1.8) | -1.5 (-1.8, -1.3) | -1.9 (-2.1, -1.6) | -1.6 (-1.9, -1.4) |
| Aggregated subgroups† |  |  |  |  |  |  |
| Acute coronary syndrome | -6.1 (-6.5, -5.7) | -5.0 (-5.4, -4.6) | -4.8 (-5.2, -4.4) | -1.7 (-2.0, -1.4) | -2.3 (-2.6, -1.9) | -1.9 (-2.2, -1.5) |
| Chronic CHD | -1.2 (-1.5, -1.0) | -0.5 (-0.8, -0.2) | -0.7 (-1.0, -0.4) | -1.3 (-1.7, -1.0) | -1.4 (-1.8, -1.1) | -1.4 (-1.7, -0.1) |
| Subgroups |  |  |  |  |  |  |
| Myocardial infarction | -4.7 (-5.1, -4.2) | -3.2 (-3.7, -2.3) | -3.0 (-3.5, -2.5) | +2.2 (+1.8, +2.6) | +1.8 (+1.3, +2.3) | +2.1 (+1.6, +2.6) |
| Unstable angina | -9.7 (-10.4, -9.0) | -9.2 (-10.0, -8.5) | -9.2 (-10.0, -8.5) | -7.2 (-7.7, -6.7) | -7.7 (-8.2, -7.2) | -7.4 (-8.0, -6.9) |
| Stable angina | -4.9 (-5.6, -4.2) | -4.6 (-5.4, -3.9) | -4.8 (-5.5, -4.0) | -5.4 (-5.8, -4.9) | -5.5 (-5.9, -5.0) | -5.1 (-5.6, -4.6) |
| Other CHD | -0.7 (-1.0, -0.5) | +0.2 (-0.1, +0.5) | -0.1 (-0.4, +0.2) | +3.3 (+2.8, +3.8) | +3.1 (+2.6, +3.6) | +3.1 (+2.6, +3.7) |
| **Women** |  |  |  |  |  |  |
| Total CHD | -3.9 (-4.3, -3.6) | -3.3 (-3.6, -2.9) | -3.3 (-3.7, -3.0) | -1.6 (-2.0,-1.3) | -2.0 (-2.4, -1.7) | -1.8 (-2.1, -1.4) |
| Aggregated subgroups† |  |  |  |  |  |  |
| Acute coronary syndrome | -6.7 (-7.3, -6.1) | -6.0 (-6.6, -5.4) | -5.8 (-6.4, -5.2) | -2.2 (-2.7, -1.8) | -2.9 (-3.4, -2.5) | -2.6 (-3.1, -2.1) |
| Chronic CHD | -2.5 (-2.9, -2.1) | -1.9 (-2.3, -1.4) | -2.0 (-2.5, -1.6) | -0.9 (-1.4, -0.3) | -1.0 (-1.5, -0.4) | -0.7 (-1.3, -0.2) |
| Subgroups |  |  |  |  |  |  |
| Myocardial infarction | -5.0 (-5.7, -4.3) | -3.9 (-4.7, -3.2) | -3.7 (-4.5, -3.0) | +1.8 (+1.2, +2.5) | +1.1 (+0.4, +1.8) | +1.4 (+0.6, +2.1) |
| Unstable angina | -9.8 (-10.7, -8.9) | -9.6 (-10.6, -8.7) | -9.6 (-10.6, -8.6) | -6.7 (-7.3, -6.0) | -7.1 (-7.8, -6.4) | -6.9 (-7.6, -6.2) |
| Stable angina | -6.7 (-7.6, -5.8) | -6.6 (-7.5, -5.7) | -6.7 (-7.6, -5.7) | -3.3 (-3.9, -2.6) | -3.4 (-4.1, -2.8) | -3.1 (-3.8, -2.4) |
| Other CHD | -1.4 (-1.9, -1.0) | -0.5 (-1.0, 0) | -0.6 (-1.2, -0.1) | +3.5(+2.6, +4.4) | +3.4 (+2.5, +4.4) | +3.6 (+2.6, +4.6) |

*Estimated from the exponential of the beta-coefficient for calendar year from age-adjusted Poisson regression models.

†Acute coronary syndrome comprises myocardial infarction + unstable angina; Chronic CHD comprises stable angina + Other CHD.

‡Inter-hospital or within-hospital transfers are linked to represent one admission.

CHD, coronary heart disease.

Supplementary Table 3. Age-specific trends (average annual % change (95% CI)) in coronary heart disease subgroup hospitalisations in England and Australia

|  | | Subgroup | 1996-2003 | | 2004-2013 | |
| --- | --- | --- | --- | --- | --- | --- |
| England | Australia | England | Australia |
| 35-54 years | Men | Myocardial infarction | -1.1 (-1.4, -0.8) | +2.2 (+1.8, +2.6) | -1.7 (-1.9, -1.5) | -1.1 (-1.3, -0.8) |
| Unstable angina | +2.3 (+1.9, +2.7) | -4.9 (-5.3, -4.5) | -7.4 (-7.7, -7.1) | -7.6 (-7.9, -7.3) |
| Stable angina | -6.3 (-6.7, -6.0) | -7.7 (-8.1, -7.3) | -4.1 (-4.4, -3.8) | -6.2 (-6.5, -5.8) |
| Other CHD | +1.7 (+1.4, +1.9) | -5.2 (-5.6, -4.7) | -2.8 (-3.0, -2.7) | -2.0 (-2.3, -1.6) |
| Acute coronary syndrome | -0.4 (-0.5, -0.3) | -1.6 (-1.9, -1.3) | -3.8 (-3.9, -3.6) | -3.4 (-3.6, -3.2) |
| Chronic CHD | -0.6 (-0.8, -0.4) | -6.4 (-6.7, -6.1) | -3.1 (-3.2, -3.0) | -3.9 (-4.2, -3.7) |
| **Total CHD** | **-0.3 (-0.4, -0.1)** | **-3.6 (-3.8, -3.4)** | **-3.4 (-3.5, -3.2)** | **-3.6 (-3.7, -3.4)** |
|  |  |  |  |  |  |
| Women | Myocardial infarction | +0.4 (-0.3, +1.1) | +4.7 (+3.8, +5.6) | 0 (-0.5, +0.4) | +1.9 (+1.4, +2.4) |
| Unstable angina | +5.1 (+4.5, +5.7) | -2.1 (-2.7, -1.5) | -7.0 (-7.5, -6.6) | -6.1 (-6.5, -5.6) |
| Stable angina | -2.9 (-3.4, -2.4) | -5.3 (-6.0, -4.6) | -4.1 (-4.5, -3.7) | -4.0 (-4.6, -3.5) |
| Other CHD | +3.1 (+2.6, +3.6) | -2.5 (-3.4, -1.5) | -1.9 (-2.2, -1.5) | -1.8 (-2.5, -1.1) |
| Acute coronary syndrome | +3.1 (+2.6, +3.6) | +0.1 (-0.4, +0.6) | -3.6 (-3.9, -3.3) | -2.0 (-2.3, -1.6) |
| Chronic CHD | +0.3 (0, +0.7) | -4.2 (-4.8, -3.6) | -2.7 (-2.9, -2.4) | -3.1 (-3.6, -2.7) |
| **Total CHD** | **+1.4 (+1.1, +1.7)** | **-1.7 (-2.1, -1.4)** | **-3.0 (-3.2, -2.8)** | **-2.4 (-2.7, -2.1)** |
|  |  |  |  |  |  |  |
| 55-64 years | Men | Myocardial infarction | -3.6 (-3.8, -3.3) | +1.5 (+1.1, +1.9) | -2.1 (-2.3, -1.9) | -1.2 (-1.4, -0.9) |
| Unstable angina | -1.2 (-1.5, -0.8) | -5.0 (-5.3, -4.7) | -6.4 (-6.7, -6.1) | -9.1 (-9.4, -8.9) |
| Stable angina | -7.8 (-8.1, -7.5) | -6.3 (-6.7, -6.0) | -3.1 (-3.4, -2.8) | -7.2 (-7.5, -7.0) |
| Other CHD | +2.2 (+2.0, +2.3) | -1.9 (-2.3, -1.5) | -2.8 (-2.9, -2.6) | -1.1 (-1.4, -0.9) |
| Acute coronary syndrome | -2.6 (-2.8, -2.3) | -2.3 (-2.6, -2.1) | -3.6 (-3.8, -3.4) | -4.4 (-4.6, -4.3) |
| Chronic CHD | -0.4 (-0.6, -0.2) | -4.0 (-4.3, -3.7) | -2.8 (-2.9, -2.7) | -3.7 (-3.8, -3.5) |
| **Total CHD** | **-1.2 (-1.3, -1.1)** | **-3.1 (-3.3, -3.0)** | **-3.1 (-3.2, -3.0)** | **-4.1 (-4.2, -3.9)** |
|  |  |  |  |  |  |
| Women | Myocardial infarction | -4.8 (-5.2, -4.3) | +1.3 (+0.5, +2.0) | -1.5 (-1.9, -1.2) | -0.8 (-1.3, -0.4) |
| Unstable angina | +0.6 (+0.1, +1.0) | -5.3 (-5.8, -4.8) | -7.6 (-8.0, -7.3) | -8.5 (-8.9, -8.1) |
| Stable angina | -5.7 (-6.1, -5.2) | -5.7 (-6.3, -5.1) | -5.1 (-5.5, -4.7) | -6.7 (-7.2, -6.3) |
| Other CHD | +2.4 (+2.1, +2.8) | -2.1 (-2.8, -1.4) | -3.1 (-3.3, -2.9) | -2.2 (-2.7, -1.7) |
| Acute coronary syndrome | -2.0 (-2.4, -1.7) | -3.2 (-3.6, -2.8) | -4.4 (-4.6, -4.1) | -4.7 (-4.9, -4.4) |
| Chronic CHD | -0.7 (-1.0, -0.4) | -4.1 (-4.5, -3.6) | -3.6 (-3.8, -3.4) | -4.5 (-4.8, -4.1) |
| **Total CHD** | **-1.2 (-1.4, -1.0)** | **-3.6 (-3.9, -3.3)** | **-3.9 (-4.0, -3.7)** | **-4.6 (-4.8, -4.4)** |
| 65-74 years | Men | Myocardial infarction | -2.5 (-2.8, -2.3) | +1.9 (+1.5, +2.2) | -4.0 (-4.2, -3.8) | -1.7 (-1.9, -1.4) |
| Unstable angina | +2.5 (+2.2, +2.8) | -4.9 (-5.2, -4.6) | -8.1 (-8.3, -7.8) | -8.8 (-9.1, -8.6) |
| Stable angina | -5.3 (-5.6, -5.0) | -5.3 (-5.7, -5.0) | -3.9 (-4.2, -3.6) | -6.1 (-6.4, -5.9) |
| Other CHD | +7.9 (+7.7, +8.1) | -0.7 (-1.0, -0.4) | -3.0 (-3.1, -2.9) | +0.9 (+0.7, +1.1) |
| Acute coronary syndrome | -0.5 (-0.7, -0.3) | -2.3 (-2.6, -2.1) | -5.4 (-5.6, -5.3) | -4.8 (-4.9, -4.6) |
| Chronic CHD | +4.8 (+4.5, +5.1) | -3.0 (-3.2, -2.7) | -3.1 (-3.2, -3.0) | -2.0 (-2.1, -1.8) |
| **Total CHD** | **+2.2 (+2.1, +2.3)** | **-2.6 (-2.8, -2.5)** | **-3.9 (-3.9, -3.8)** | **-3.4 (-3.5, -3.2)** |
|  |  |  |  |  |  |
| Women | Myocardial infarction | -3.4 (-3.8, -3.1) | +1.5 (+1.0, +2.1) | -4.5 (-4.8, -4.2) | -2.1 (-2.4, -1.7) |
| Unstable angina | +3.4 (+3.0, +3.8) | -5.1 (-5.5, -4.7) | -8.5 (-8.8, -8.2) | -9.4 (-9.7, -9.0) |
| Stable angina | -4.2 (-4.6, -3.9) | -5.0 (-5.5, -4.5) | -5.7 (-6.0, -5.4) | -6.3 (-6.6, -5.9) |
| Other CHD | +8.3 (+8.0, +8.6) | -0.4 (-1.0, +0.1) | -3.6 (-3.8, -3.5) | -1.1 (-1.4, -0.7) |
| Acute coronary syndrome | -0.4 (-0.6, -0.1) | -2.8 (-3.1, -2.5) | -6.2 (-6.4, -5.9) | -5.5 (-5.7, -5.3) |
| Chronic CHD | +3.3 (+3.1, +3.6) | -2.9 (-3.3, -2.6) | -4.1 (-4.3, -4.0) | -3.5 (-3.8, -3.2) |
| **Total CHD** | **+1.6 (+1.5, +1.8)** | **-2.9 (-3.1, -2.6)** | **-4.8 (-5.0, -4.7)** | **-4.6 (-4.8, -4.4)** |
|  |  |  |  |  |  |  |
| 75-84 years | Men | Myocardial infarction | 0 (-0.3, +0.3) | +3.5 (+3.0, +3.9) | -4.2 (-4.4, -4.0) | -1.6 (-1.8, -1.3) |
| Unstable angina | +4.9 (+4.5, +5.3) | -3.4 (-3.8, -3.1) | -6.4 (-6.7, -6.1) | -8.1 (-8.4, -7.8) |
| Stable angina | -4.3 (-4.7, -3.9) | -1.7 (-2.2, -1.2) | -1.8 (-2.1, -1.5) | -5.1 (-5.4, -4.7) |
| Other CHD | +11.9 (+11.5, +12.3) | +4.9 (+4.4, +5.4) | +2.0 (+1.9, +2.2) | +1.5 (+1.2, +1.8) |
| Acute coronary syndrome | +1.8 (+1.5, +2.0) | -0.6 (-0.9, -0.3) | -4.9 (-5.1, -4.8) | -4.2 (-4.4, -4.0) |
| Chronic CHD | +4.8 (+4.5, +5.1) | +1.4 (+1.0, +1.7) | +1.2 (+1.1, +1.4) | -1.4 (-1.6, -1.2) |
| **Total CHD** | **+3.1 (+2.9, +3.2)** | **+0.2 ( 0.0, +0.4)** | **-1.4 (-1.5, -1.3)** | **-3.0 (-3.1, -2.8)** |
|  |  |  |  |  |  |
| Women | Myocardial infarction | -0.4 (-0.7, -0.1) | +2.7 (+2.2, +3.2) | -4.0 (-4.2, -3.7) | -2.0 (-2.3, -1.7) |
| Unstable angina | +4.8 (+4.4, +5.2) | -4.1 (-4.5, -3.8) | -6.8 (-7.1, -6.5) | -9.2 (-9.5, -8.8) |
| Stable angina | -4.2 (-4.5, -3.8) | -2.7 (-3.2, -2.3) | -3.2 (-3.5, -2.9) | -5.8 (-6.2, -5.5) |
| Other CHD | +8.0 (+7.6, +8.5) | +4.8 (+4.1, +5.4) | +2.4 (+2.2, +2.6) | +0.6 (+0.2, +1.0) |
| Acute coronary syndrome | +1.6 (+1.3, +1.8) | -1.4 (-1.7, -1.1) | -4.9 (-5.1, -4.8) | -4.9 (-5.1, -4.7) |
| Chronic CHD | +1.1 (+0.8, +1.4) | +0.1 (-0.3, +0.5) | +0.6 (+0.4, +0.8) | -2.7 (-3.0, -2.5) |
| **Total CHD** | **+1.4 (+1.2, +1.6)** | **-0.9 (-1.1, -0.7)** | **-2.1 (-2.2, -1.9)** | **-4.1 (-4.2, -3.9)** |


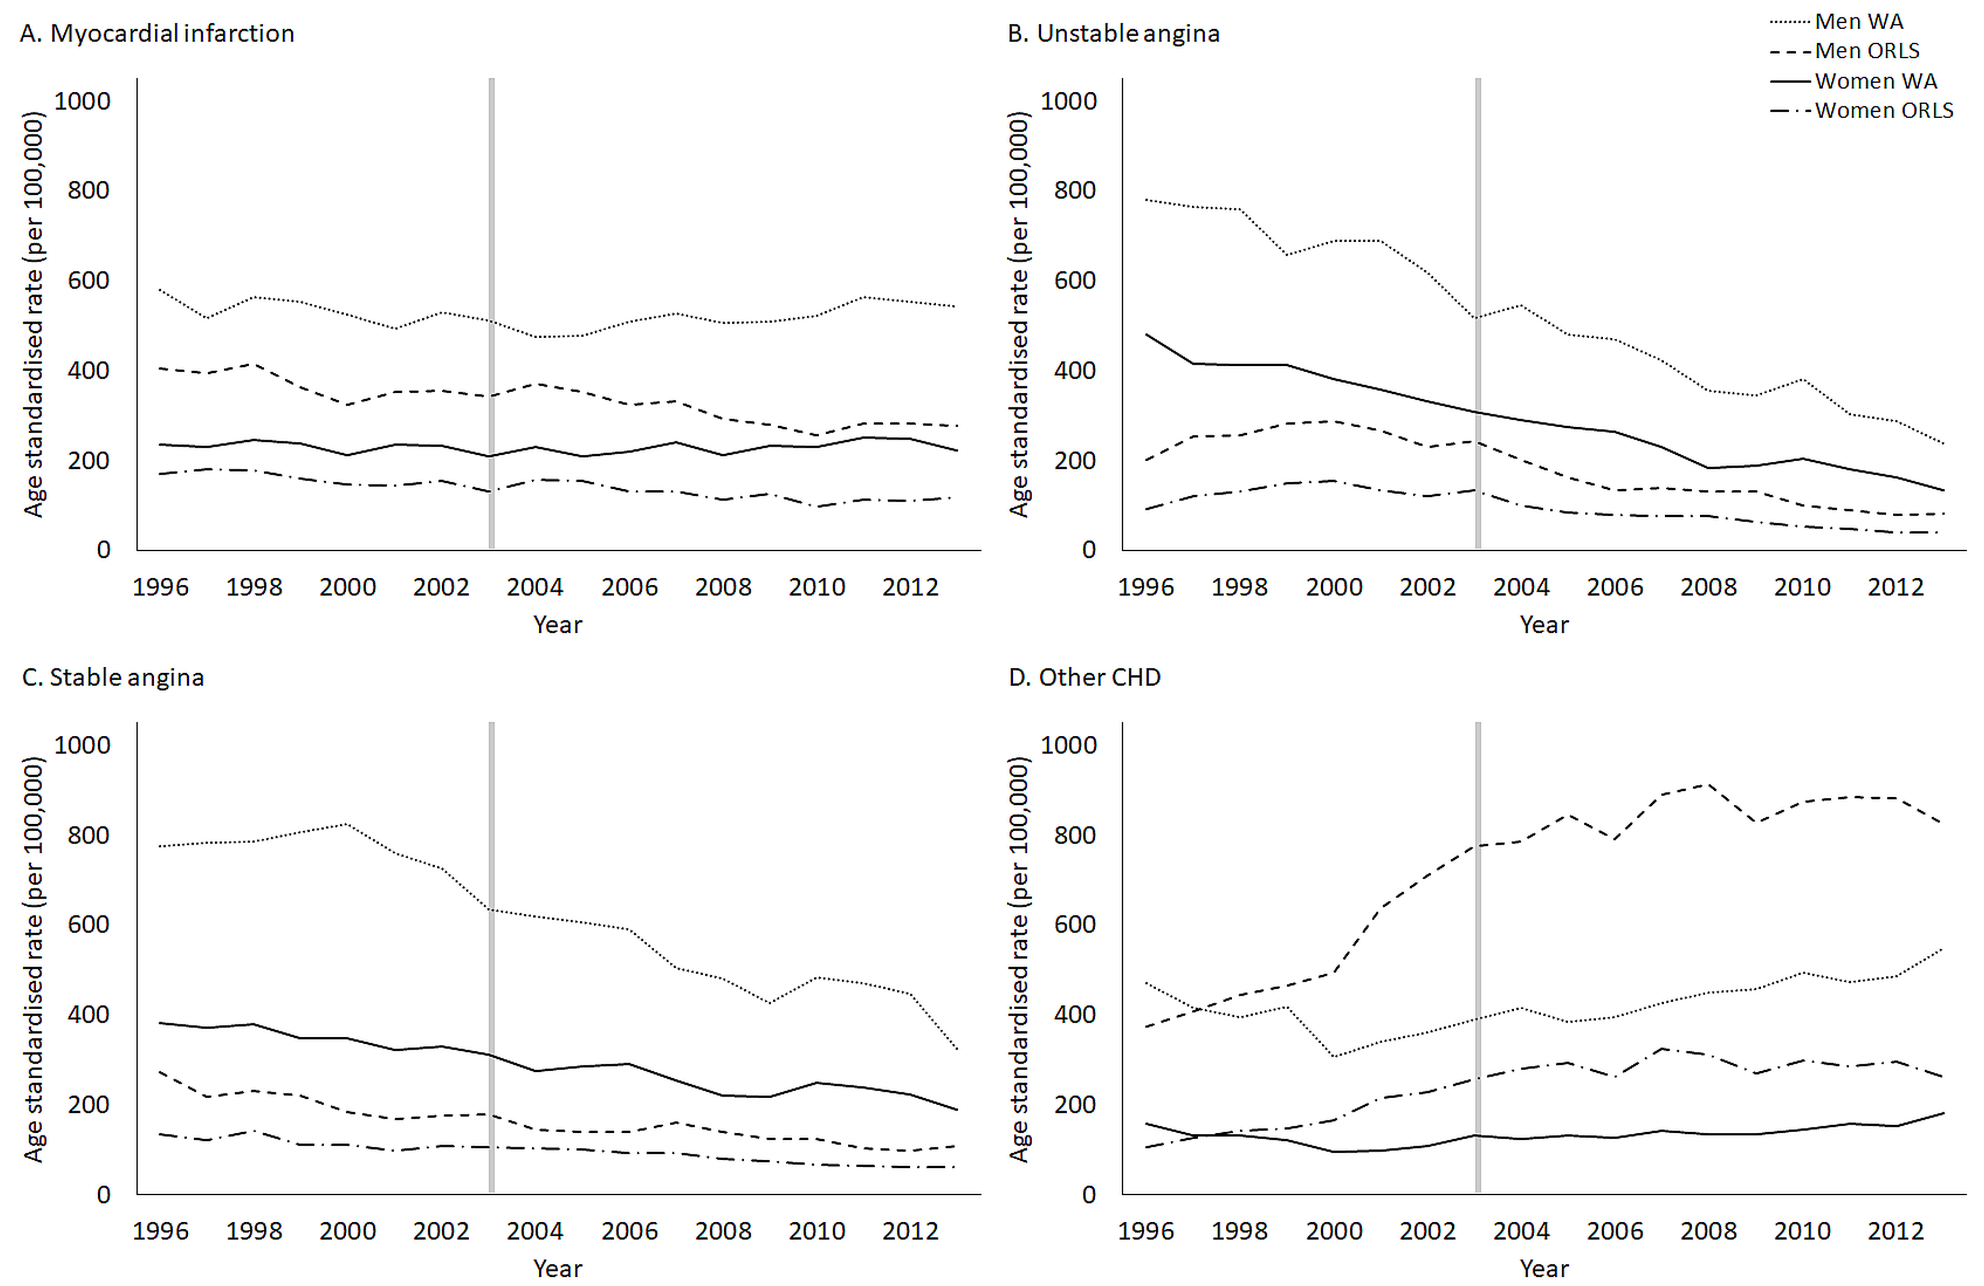

Supplementary Figure 1. Age-standardised hospitalisation rates for (A) myocardial infarction, (B) unstable angina, (C) stable angina, and (D) other CHD for Oxford Record Linkage Study and Western Australia, stratified by sex. Hospitalisation rates are based on linked admissions.
